# Supplementary material
Source: PubMed Central journal article supplement (PMC8021245)
Supplement: jppt_26_3_Tjugum_S_Figure.pdf [file jppt_26_3_Tjugum_S_Figure.pdf]

**Figure S. Medication Regimen Complexity Index scoring tool.**

**MEDICATION REGIMEN COMPLEXITY INDEX**

Patient ID: -----  
 Total no. of medications (including prn/sos medications): -----

**Instructions**

- MRCI applies only to prescribed medications. All entries are to be made only based on information on the label or drug chart (at the time of dispensing or discharge). No assumptions are to be made based on clinical judgement.
- There are three sections in the scale. Complete each section before proceeding to the next. At the end, add the scores for the three sections to give the MRCI.
- If the same medication (same brand and same dosage form) is present more than once in different strengths in a regimen (e.g. Mavevan 5mg, 3mg and 1 mg mdu), it is still considered as one medication.
- In cases where the dosage is optional, choose the dosing instruction with the smallest dose/frequency. (e.g. Ventolin MDI 1-2 puffs, 2-3 times daily will get weightings for 'metered dose inhalers', 'variable dose' and 'twice daily', but not for 'multiple units at one time')
- In certain cases the dosing frequency needs to be calculated (e.g. Ranitidine 1mane and 1nocte is twice daily)
- It is possible that with certain 'use as directed' instructions, the regimen will not get a score under dosing frequency (e.g. Prednisolone 5mg mdu)
- If there is more than one dosing frequency direction, they should be scored for all the dosing frequency directions (e.g. Ventolin MDI 2 puffs bd and pm, will get scores for 'metered dose inhalers', 'multiple units at one time', 'twice daily' as well as 'prn')
- Instances where two or more medications are mutually exclusive, they need to be scored twice or more as prn with the recommended dosing frequency (e.g. Ventolin MDI or Ventolin nebuliser twice daily will get scores for both 'metered dose inhalers' and 'nebuliser' under dosage forms, but needs to be scored two times for 'twice daily prn')
- In cases where there is no matching option, choose the closest option (e.g. six times daily could be considered as 'q4h')

A) Circle the weighting corresponding to each dosage form (ONCE ONLY) present in the regimen.

|                            | Dosage Forms                 | Weighting |
|----------------------------|------------------------------|-----------|
| ORAL                       | Capsules/Tablets             | 1         |
|                            | Gargles/Mouthwashes          | 2         |
|                            | Gums/Lozenges                | 2         |
|                            | Liquids                      | 2         |
|                            | Powders/Granules             | 2         |
|                            | Sublingual sprays/tabs       | 2         |
| TOPICAL                    | Creams/Gels/Ointments        | 2         |
|                            | Dressings                    | 3         |
|                            | Paints/Solutions             | 2         |
|                            | Pastes                       | 3         |
|                            | Patches                      | 2         |
|                            | Sprays                       | 1         |
| EAR, EYE & NOSE            | Ear drops/creams/ointments   | 3         |
|                            | Eye drops                    | 3         |
|                            | Eye gels/ointments           | 3         |
|                            | Nasal drops/cream/ointment   | 3         |
| INHALATION                 | Nasal spray                  | 2         |
|                            | Accuhalers                   | 3         |
|                            | Aerolizers                   | 3         |
|                            | Metered dose inhalers        | 4         |
|                            | Nebuliser                    | 5         |
|                            | Oxygen/Concentrator          | 3         |
|                            | Turbuhalers                  | 3         |
|                            | Other DPIs                   | 3         |
|                            | Dialysate                    | 5         |
|                            | Enemas                       | 2         |
| OTHERS                     | Injections: Prefilled        | 3         |
|                            | Ampoules/Vials               | 4         |
|                            | Pessaries                    | 3         |
|                            | Patient controlled analgesia | 2         |
|                            | Suppositories                | 2         |
|                            | Vaginal creams               | 2         |
| <b>Total for Section A</b> |                              |           |

B) For each medication in the regimen tick a box [✓] corresponding to the dosing frequency. Then, add the no. of [✓] in each category and multiply by the assigned weighting. In cases where there is no exact option, choose the best option.

| Dosing Frequency                     | Medications | Total | Weighting | Weighting × No. of medications |
|--------------------------------------|-------------|-------|-----------|--------------------------------|
| Once daily                           |             |       | 1         |                                |
| Once daily prn                       |             |       | 0.5       |                                |
| Twice daily                          |             |       | 2         |                                |
| Twice daily prn                      |             |       | 1         |                                |
| Three times daily                    |             |       | 3         |                                |
| Three times daily prn                |             |       | 1.5       |                                |
| Four times daily                     |             |       | 4         |                                |
| Four times daily prn                 |             |       | 2         |                                |
| q 12h                                |             |       | 2.5       |                                |
| q 12h prn                            |             |       | 1.5       |                                |
| q 8h                                 |             |       | 3.5       |                                |
| q 8h prn                             |             |       | 2         |                                |
| q 6h                                 |             |       | 4.5       |                                |
| q 6h prn                             |             |       | 2.5       |                                |
| q 4h                                 |             |       | 6.5       |                                |
| q 4h prn                             |             |       | 3.5       |                                |
| q 2h                                 |             |       | 12.5      |                                |
| q 2h prn                             |             |       | 6.5       |                                |
| prn/sos                              |             |       | 0.5       |                                |
| On alternate days or less frequently |             |       | 2         |                                |
| Oxygen prn                           |             |       | 1         |                                |
| Oxygen <15hrs                        |             |       | 2         |                                |
| Oxygen >15hrs                        |             |       | 3         |                                |
| <b>Total for Section B</b>           |             |       |           |                                |

C) Tick a box [✓] corresponding to the additional directions, if present in the regimen. Then, add the no. of [✓] in each category and multiply by the assigned weighting.

| Additional Directions                                                    | Medications | Total | Weighting | Weighting × No. of medications |
|--------------------------------------------------------------------------|-------------|-------|-----------|--------------------------------|
| Break or crush tablet                                                    |             |       | 1         |                                |
| Dissolve tablet/powder                                                   |             |       | 1         |                                |
| Multiple units at one time (e.g. 2 tabs, 2 puffs)                        |             |       | 1         |                                |
| Variable dose (e.g. 1-2 caps, 2-3 puffs)                                 |             |       | 1         |                                |
| Take/use at specified time/s (e.g. mane, nocte, 8 AM)                    |             |       | 1         |                                |
| Relation to food (e.g. pc, ac, with food)                                |             |       | 1         |                                |
| Take with specific fluid                                                 |             |       | 1         |                                |
| Take/use as directed                                                     |             |       | 2         |                                |
| Tapering/increasing dose                                                 |             |       | 2         |                                |
| Alternating dose (e.g. one mane & two nocte, one/ two on alternate days) |             |       | 2         |                                |
| <b>Total for Section C</b>                                               |             |       |           |                                |

Medication Regimen Complexity = Total (A) + Total (B) + Total (C)=
